# Supplementary material for: The relationship between childhood body weight and dental caries experience: an umbrella systematic review protocol
Source: Springer Nature journal article supplement (doi:10.1186/s13643-017-0610-8), 2017-10-25
Supplement: MOESM2 [file 15164204]

## Additional file 1: Search Strategy - Medline (Ovid)

The relationship between childhood body weight and dental caries experience: an umbrella systematic review protocol

Search strategy. Database: Medline using EBSCO (search date: 06.10.16)

| Search | Query                                                                                                                                                                                                                                                     | Items Found |
|--------|-----------------------------------------------------------------------------------------------------------------------------------------------------------------------------------------------------------------------------------------------------------|-------------|
| #1     | Search (MH "Dental Caries+") OR "caries" OR "tooth decay" OR (MH "DMF Index") OR "dmf" OR "dmft" OR "dmfs" OR (MH "Oral Health") OR (MH "Dental Health Surveys")                                                                                          | 69,233      |
| #2     | Search systematic review or meta-analysis                                                                                                                                                                                                                 | 150,011     |
| #3     | Search ((MH "Dental Caries+") OR "caries" OR "tooth decay" OR (MH "DMF Index") OR "dmf" OR "dmft" OR "dmfs" OR (MH "Oral Health") OR (MH "Dental Health Surveys")) AND (#2)                                                                               | 601         |
| #4     | Search (MH "Body Weight+") OR (MH "Body Size+") OR (MH "Body Fat Distribution") OR (MH "Anthropometry") OR (MH "Body Weights and Measures") OR (MH "Birth Weight") OR (MH "Body Height") OR (MH "Waist Circumference") OR (MH "Body Mass Index") OR "BMI" | 521,592     |
| #5     | Search (MH "Obesity") OR "obesity" OR (MH "Pediatric Obesity") OR (MH "Obesity, Abdominal") OR (MH "Obesity, Morbid") OR (MH "Adiposity") OR (MH "Overweight") OR "overweight"                                                                            | 262,483     |
| #6     | Search (MH "Thinness") OR "underweight" OR "low weight"                                                                                                                                                                                                   | 12,709      |
| #7     | Search (#4) OR (#5) OR (#6)                                                                                                                                                                                                                               | 2,855,659   |

|     |                                                                                                         |         |
|-----|---------------------------------------------------------------------------------------------------------|---------|
| #8  | Search (MH "Child+") OR "children" OR (MH "Adolescent") OR (MH "Child, Preschool") OR (MH "Pediatrics") | 593,300 |
| #9  | Search (#3) AND (#7)                                                                                    | 15      |
| #10 | Search (#9) AND (#8)                                                                                    | 10      |
| #11 | Search (#10) AND Limiters (Date of Publication: 19900101-20151231)                                      | 10      |
| #12 | Search #11 AND Limiters (Date of Publication: 20060101-20151231; English Language)                      | 9       |
